# Supplementary material for: Alkaloids Profiling of Fumaria capreolata by Analytical Platforms Based on the Hyphenation of Gas Chromatography and Liquid Chromatography with Quadrupole-Time-of-Flight Mass Spectrometry
Source: Int J Anal Chem. 2017 Nov 28;2017:5178729. doi: 10.1155/2017/5178729 (PMC5733964; doi:10.1155/2017/5178729)
Supplement: Supplementary file 2 [file 5178729.f2.xlsx]

## Sheet: Table S1
Table S1. Characterization of alkaloids from F. capreolata extract by GC-QTOF-MS.
Peak Nº	RT (min)	Proposed alkaloid	Precursor m/z (M+)	Molecular formula	Score	Mass error (ppm)	EI-MS m/z (relative intensity, %)	Alkaloid type	Alkaloids previously reported in F. capreolata	Fragmentation pattern in NIST11.L	Fragmentation pattern in MassBank	Fragmentation (Ref.)
1	17.524	Stylopine	323.114	C19H17NO4	94.2	3.96	323.1139 (44), 322.1071 (52), 148.0523 (100), 91.0541 (26)	Protoberberine	[1,2,3]	Yes	No	[1,2]
2	18.725	Protopine	353.125	C20H19NO5	94.12	3.53	163.0396 (19), 149.0564 (11), 148.0518 (100), 91.0539 (14)	Protopine	[1,2,3]	Yes	No	[1,2]
3	20.431	Cheilanthifoline	325.13	C19H19NO4	91.4	3.86	325.1289 (40), 324.1215 (46), 149.0581 (26), 148.0518 (100)	Protoberberine	[4]	Yes	No	[6]
4	21.167	Isoboldine	327.144	C19H21NO4	79.89	8.09	327.1438 (54), 326.1375 (100), 284.1048 (32), 253.0833 (27)	Aporphine	[3,4]	Yes	No
5	23.81	Coreximine	327.143	C19H21NO4	69.36	3.57	327.1436 (57), 326.1376 (63), 178.0841 (100), 176.069 (45)	Protoberberine	No (but present in other plants of Fumarioideae, Knapsack database)	Yes	No
6	24.68	Dihydrosanguinarine	333.097	C20H15NO4	83.26	7.01	334.1014 (18), 333.0971 (88), 332.0899 (100), 105.0669 (15)	Benzophenanthridine	[1]	No	No	[1,6]
7	25.163	Fumariline	351.109	C20H17NO5	95.55	3.5	336.0862 (28), 323.1104 (25), 322.1061 (100), 264.1006 (29)	Spirobenzylisoquinoline	[1,2,5]	Yes	No	[1,2,6]
8	29.766	Parfumine	353.125	C20H19NO5	89.2	4.43	353.1246 (17), 338.1006 (29), 325.1252 (26), 324.1215 (100), 322.086 (31), 308.126 (31)	Spirobenzylisoquinoline	[1,5]	No	No	[1,6]
References:
[1]	Suau, R.; Cabezudo, B.; Rico, R.; Nájera, F.; López-Romero, J. M. Direct determination of alkaloid contents in fumaria species by GC-MS. Phytochem. Anal. 2002, 13, 363–367.
[2]	Maiza-Benabdesselam, F.; Chibane, M.; Madani, K.; Max, H.; Adach, S. Determination of isoquinoline alkaloids contents in two Algerian species of Fumaria: Fumaria capreolata and Fumaria bastardi. Rec. Nat. Prod. 2007, 3, 28–35.
[3]	Tanahashi, T.; Zenk, M. H. Isoquinoline alkaloids from cell suspension cultures of Fumaria capreolata. Plant Cell Rep. 1985, 4, 96–99.
[4]	Forgacs, P.; Provost, J.; Touche, A.; Jehanno, A. Alkaloids from Fumaria capreolata and Fumaria bella. J. Nat. Prod. 1986, 49, 178–179.
[5]	Soušek, J.; Guédon, D.; Adam, T.; Bochořáková, H.; Táborska, E.; Válka, I.; Šimánek, V. Alkaloids and organic acids content of eight Fumaria species. Phytochem. Anal. 1999, 10, 6–11.
[6]	Bougoffa-Sadaoui, K.; Gontier, E.; Telliez, M. S.; Lequart-Pillon, M.; Ouadid-Ahidouch, H.; Maiza-Benabdesselam, F. Characterization of isoquinolin alkaloids from Fumaria agraria and evaluation of their antiproliferative activity against human breast cancer cell lines. Phytothérapie 2016, 14, 188-195
Šimánek
