# Supplementary material for: Alkaloids Profiling of Fumaria capreolata by Analytical Platforms Based on the Hyphenation of Gas Chromatography and Liquid Chromatography with Quadrupole-Time-of-Flight Mass Spectrometry
Source: Int J Anal Chem. 2017 Nov 28;2017:5178729. doi: 10.1155/2017/5178729 (PMC5733964; doi:10.1155/2017/5178729)
Supplement: Supplementary file 3 [file 5178729.f3.xlsx]

## Sheet: Table S2
Table S2. Characterization of alkaloids from F. capreolata extract by RP-UHPLC-QTOF-MS.
Peak Nº	RT (min)	Proposed alkaloid	Molecular formula	Experimental m/z ([M+H]+/M+)	Error (ppm)	Score	UV max. (nm)	Main fragments in MS/MS	Alkaloid type	Alkaloids previously reported in F. capreolata	Fragmentation pattern in MassBank/Metlin databases	Fragmentation (Ref.)
1	11.587	Pallidine	C19H21NO4	328.154	-0.56	98.86	282	297.1051, 265.0834, 251.0635, 243.0954, 237.0846, 211.0704, 192.0962	Morphinandienone	[1]	No/No	[6]
2	11.772	Derivative of isoboldine (demethyl)	C18H19NO4	314.138	3.79	91.27	268, 306	283.0920, 268.0680, 251.0664, 233.0555, 223.0716, 205.0617	Aporphine
3	12.143	N,N-dimethylcoclaurine	C19H24NO3+	314.176	-3.87	95.06	260, 358	299.1133, 298.1061, 269.1159, 237.0903, 209.0957, 175.0762, 121.0610, 107.0497	Benzylisoquinoline		No/No	[7]
4	12.328	Fumaritine	C20H21NO5	356.148	0.62	94.39	283	338.1313, 277.0788, 249.0847, 137.0541	Spirobenzylisoquinoline	[2]	No/No
5	13.316	Coclaurine	C17H19NO3	286.143	2	88	286	269.1131, 237.0864, 209.0921, 175.0723, 145.0631, 143.0457, 107.0460	Benzylisoquinoline		No/Yesa	[8]
6	13.439	N-methylcoclaurine	C18H21NO3	300.159	3	96.01	282	269.1105, 237.0846, 209.0902, 177.0489, 175.0692, 145.0232, 107.0445	Benzylisoquinoline	[1]	No/Yesa	[8]
7	14.119	Magnoflorine	C20H24NO4+	342.17	-0.37	99.45	268, 305	297.1081, 282.0853, 265.0828, 237.0915, 191.0832	Aporphine	[1]	No/Yesa	[9]
8	14.799	Reticuline	C19H23NO4	330.17	1.58	96.64	281	192.0990, 175.0719, 143.0460, 137.0564	Benzylisoquinoline	[1]	No/Yesa
9	15.045	Parfumine	C20H19NO5	354.134	-1.36	97.15	271, 372	336.1191, 323.0927, 305.0774, 295.0930, 279.0611, 179.0912, 137.0567	Spirobenzylisoquinoline	[2,3]	No/Yesa
10	15.292	Parfumidine	C21H21NO5	368.148	3.72	93.5	290	323.0859, 305.0756, 293.0754, 261.0502, 193.1053, 137.0556	Spirobenzylisoquinoline		No/No
11	15.415	Isoboldine	C19H21NO4	328.155	-0.38	98.37	279, 304	297.1125, 282.0840, 265.0826, 237.0877, 233.0559, 205.0610	Aporphine	[1,4]	No/Yesa	[10]
12	15.725	Coreximine	C19H21NO4	328.154	2.36	96.5	282	313.1226, 178.0803, 151.0693, 119.0436, 91.0493	Protoberberine		No/Yesa	[8]
13	16.033	Methylcoreximine 1	C20H23NO4	342.17	-0.31	99.12	282	327.1431, 192.0989, 177.0754, 151.0728, 137.0573	Protoberberine		No/No
14	16.465	Methylcoreximine 2	C20H23NO4	342.17	-0.38	97.27	280	192.0976, 177.0743, 151.0712	Protoberberine		No/No
15	16.527	Cheilanthifoline	C19H19NO4	326.14	-1.06	90.59	285	311.1157, 192.0988, 178.0829, 151.0721, 119.0461, 91.0517	Protoberberine	[4]	No/Yesa	[8]
16	17.577	Dehydrocheilanthifoline	C19H16NO4+	322.107	0.3	99.31	267, 355, 458	307.0755, 294.1039, 279.0808, 264.0663, 250.0778, 222.0839	Protoberberine	[1]	No/No
17	18.107	Demethyleneberberine/jatrorubine	C19H18NO4+	324.122	3.82	92.37	276, 355	309.1003, 294.0765, 266.0814, 210.0910	Protoberberine		No/No	[11]
18	18.317	Cryptopine	C21H23NO5	370.16	1.19	97.24	283	291.1008, 222.1115, 204.1006, 190.0853, 165.0898, 165.0536, 149.0582	Protopine	[2]	Yes/No	[8]
19	18.688	Protopine	C20H19NO5	354.134	-0.86	96.41	288	206.0780, 189.0755, 188.0678, 165.0518, 149.0603	Protopine	[1,3,5]	Yes/Yes	[12]
20	19.243	Fumariline	C20H17NO5	352.119	-2.82	92.98	270, 372	334.1026, 309.0703, 279.0601, 263.0653, 177.0740, 135.0404	Spirobenzylisoquinoline	[2,3,5]	No/No
21	19.861	Stylopine	C19H17NO4	324.123	-0.44	99.31	288	176.0678, 149.0563, 119.0459, 91.0515	Protoberberine	[1,3,5]	No/No	[13,14]
22	20.047	Coptisine	C19H14NO4+	320.092	-1.22	90.14	265, 357, 459	305.0668, 292.0912, 277.0725, 262.0855, 249.0779, 234.0905	Potoberberine	[2,3]	No/No	[15]
23	21.466	Corysamine	C20H16NO4+	334.107	3.36	95.58	268, 345, 449	320.0909, 306.1083, 291.0843, 276.0974, 261.0741, 248.1019	Potoberberine		No/No	[16]
24	23.44	Impatien C	C22H21NO6	396.145	-2.88	96.3	288	322.1019, 176.0671, 149.0557, 119.0452, 91.0507	Protoberberine		No/No
25	29.616	Dihydrosanguinarine	C20H15NO4	334.108	-2.77	90.7	277	319.0792, 318.0723, 317.0703, 304.0958, 276.0972, 274.0812	Benzophenanthridine	[3]	No/No	[13]
26	27.146	8-oxocoptisine	C19H13NO5	336.0858/358.0703b	9.16/-4.82b	71.5/92.22b	277330	320.0532, 308.0889, 278.0784, 280.0966, 174.0520	Potoberberine		No/No	[17]
Others
1'	11.278	Unknown	C11H22NO6	265.153	-3.71	94.98	290, 318	177.0511, 145.0256, 117.0313, 89.0364
2'	12.205	Unknown	C19H17NO5/C19H18NO5+	340.119	-2.95	92.67	ND	322.1015, 309.0697, 291.0601, 279.0597, 281.0766, 263.0645, 251.0653, 233.0547, 205.0592, 165.0772, 123.0402
3'	13.686	Unknown	C19H21NO4/C19H22NO4+	328.153	4.4	90.97	ND	297.1074, 282.0847, 265.0817, 237.0868, 209.0923, 191.0823
4'	23.009	Unknown	C25H25NO5	420.184	0.43	98.51	282	364.1485, 321.0935, 292.0956
5'	23.071	Unknown	C26H19NO5/C26H20NO5+	426.134	-1.18	96	ND	398.1341, 320.0867, 107.0468
6'	27.887	Unknown	C24H17NO7	432.104	7.86	77.28	330	241.0425, 219.0608, 191.0698
aInsilico predicted spectra at 10, 20 and 40V
b(M+Na)+
References
	[1]	Tanahashi, T.; Zenk, M. H. Isoquinoline alkaloids from cell suspension cultures of Fumaria capreolata. Plant Cell Rep. 1985, 4, 96–99.
	[2]	Soušek, J.; Guédon, D.; Adam, T.; Bochořáková, H.; Táborska, E.; Válka, I.; Šimánek, V. Alkaloids and organic acids content of eight Fumaria species. Phytochem. Anal. 1999, 10, 6–11.
	[3]	Suau, R.; Cabezudo, B.; Rico, R.; Nájera, F.; López-Romero, J. M. Direct determination of alkaloid contents in Fumaria species by GC-MS. Phytochem. Anal. 2002, 13, 363–367.
	[4]	Forgacs, P.; Provost, J.; Touche, A.; Jehanno, A. Alkaloids from Fumaria capreolata and Fumaria bella. J. Nat. Prod. 1986, 49, 178–179.
	[5]	Maiza-benabdesselam, F.; Khentache, S.; Bougoffa, K.; Chibane, M.; Adach, S.; Chapeleur, Y.; Max, H.; Laurain-mattar, D. Antioxidant activities of alkaloid extracts of two Algerian species of Fumaria: Fumaria capreolata and Fumaria bastardii. Rec. Nat. Prod. 2007, 3, 28–35.
	[6]	Grobe, N.; Kutchan, T. M.; Zenk, M. H. Rat CYP2D2, not 2D1, is functionally conserved with human CYP2D6 in endogenous morphine formation. FEBS Lett. 2012, 586, 1749–1753.
	[7]	Desgagne-Penix, I.; Facchini, P. J. Systematic silencing of benzylisoquinoline alkaloid biosynthetic genes reveals the major route to papaverine in opium poppy. Plant J. 2012, 72, 331–344.
	[8]	Schmidt, J.; Boettcher, C.; Kuhnt, C.; Kutchan, T. M.; Zenk, M. H. Poppy alkaloid profiling by electrospray tandem mass spectrometry and electrospray FT-ICR mass spectrometry after [ring-13C6]-tyramine feeding. Phytochemistry 2007, 68, 189–202.
	[9]	Ma, C.; Li, Z.; Wang, L.; Tang, Y.; Xiao, H. Identification of major alkaloids in rat urine by HPLC/DAD/ESI-MS/MS Method following oral administration of Cortex Phellodendri decoction. Helv. Chim. Acta 2009, 92, 379–398.
	[10]	Li, Y.; Zeng, R.; Chen, J.; Wu, Y.; Chou, G.; Gao, Y.; Shao, J.; Cai, H.; Jia, L. Pharmacokinetics and metabolism study of isoboldine , a major bioactive component from Radix Linderae in male rats by UPLC – MS/MS. J. Ethnopharmacol. 2015, 171, 154–160.
	[11]	Sun, M.; Liu, J.; Lin, C.; Miao, L.; Lin, L. Alkaloid profiling of the traditional Chinese medicine Rhizoma corydalis using high performance liquid chromatography-tandem quadrupole time-of-flight mass spectrometry. Acta Pharm. Sin. B 2014, 4 (3), 208–216.
	[12]	Ding, B.; Zhou, T.; Fan, G.; Hong, Z.; Wu, Y. Qualitative and quantitative determination of ten alkaloids in traditional Chinese medicine Corydalis yanhusuo by LC-MS/MS and LC-DAD. J. Pharm. Biomed. Anal. 2007, 45 (2), 219–226.
	[13]	Móricz, A. M.; Fornal, E.; Jesionek, W.; Majer-Dziedzic, B.; Choma, I. M. Effect-Directed Isolation and Identification of Antibacterial Chelidonium majus L. Alkaloids. Chromatographia 2015, 707–716.
	[14]	Jesionek, W.; Fornal, E.; Majer-Dziedzic, B.; Móricz, Á. M.; Nowicky, W.; Choma, I. M. Investigation of the composition and antibacterial activity of UkrainTM drug using liquid chromatography techniques. J. Chromatogr. A 2016, 1429, 340–347.
	[15]	Shim, H. J.; Lee, J. Y.; Kim, B.; Hong, J. General fragmentations of alkaloids in electrospray ionization tandem mass spectrometry. Mass Spectrom. Lett. 2013, 4, 79–82
	[16]	Li, K.; Xing, D.; Jin, W.; Sun, H.; Shi, Y. Chemical fingerprint and metabolic fingerprint analysis of the medicinal extract of Corydalis yanhusuo W.T. Wang by HPLC-UV and HPLC-MS methods. Asian J. Chem. 2011, 23, 723–728.
	[17]	Qian, P.; Zhang, Y.-B.; Yang, Y.-F.; Xu, W.; Yang, X.-W. Pharmacokinetics Studies of 12 alkaloids in rat plasma after oral administration of Zuojin and Fan-Zuojin Formulas. Molecules 2017, 22, 214.
